# Supplementary material
Source: HighWire-hosted journal article supplement (https://erj.ersjournals.com/content/56/2/2002135)
Supplement: inline-supplementary-material-1 [file inline-supplementary-material-1.pdf]

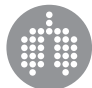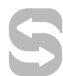

SHAREABLE PDF

AGORA

CORRESPONDENCE

ERJ European Respiratory Journal Eur Respir J 0903-1936/1399-3003 European Respiratory Society 10.1183/13993003.02135-2020 ERJ-02135-2020 AGORA CORRESPONDENCE

COVID-19 conundrum: clinical phenotyping based on pathophysiology as a promising approach to guide therapy in a novel illness CORRESPONDENCE CORRESPONDENCE COVID-19 conundrum: clinical phenotyping based on pathophysiology

Cherian Robin<sup>1</sup>, Chandra Bharatendu<sup>2</sup>, Tung Moon Ley<sup>3</sup>, Vuylsteke Alain<sup>4</sup>,

<sup>1</sup>Dept of Cardiology, National University Heart Centre Singapore, Singapore, Singapore. <sup>2</sup>Division of Neurology, National University Hospital, Singapore, Singapore. <sup>3</sup>Dept of Haematology-Oncology, National University Cancer Institute, Singapore, Singapore. <sup>4</sup>Dept of Anaesthesia and Critical care, Royal Papworth Hospital NHS Trust, Cambridge, UK.

**Correspondence:** Robin Cherian, Cardiac Critical Care, Dept of Cardiology, National University Heart Centre, NUHS Tower Block, Level 9, 1E Kent Ridge Road, Singapore 119228. E-mail: robin\_cherian@nuhs.edu.sg 20202020560306202030720202020

#### To the Editor:

We read with interest the recent editorial by Bos *et al.* [1] on the perils of premature phenotyping in coronavirus disease 2019 (COVID-19). The authors concluded that a normal compliance variant of acute respiratory distress syndrome (ARDS) does not exist, based on two small cohort studies reporting low respiratory system compliance in COVID-19 patients [2, 3]. However, this assumption may be erroneous, as, first, the admission and intubation thresholds are highly variable across units, resulting in marked heterogeneity. Secondly, several studies demonstrate that a high proportion of mechanically ventilated COVID-19 patients exhibit near-normal lung compliance [4–6].
